# Supplementary material for: Fluorine Mass Balance, including Total Fluorine, Extractable Organic Fluorine, Oxidizable Precursors, and Target Per- and Polyfluoroalkyl Substances, in Pooled Human Serum from the Tromsø Population in 1986, 2007, and 2015
Source: PubMed Central journal article supplement (PMC10569050; doi:10.1021/acs.est.3c03655), 2023-09-25
Supplement: es3c03655_si_001.pdf [file es3c03655_si_001.pdf]

1 **Fluorine mass balance, including total fluorine, extractable organic**  
2 **fluorine, oxidizable precursors and target PFAS, in pooled human**  
3 **serum from the Tromsø population in 1986, 2007 and 2015**

4 Lara Cioni<sup>1,2</sup>, Merle Plassmann<sup>3</sup>, Jonathan P. Benskin<sup>3</sup>, Ana Carolina M. F. Coêlho<sup>2</sup>, Therese  
5 H. Nøst<sup>2</sup>, Charlotta Rylander<sup>2</sup>, Vladimir Nikiforov<sup>1</sup>, Torkjel M. Sandanger<sup>1,2</sup>, Dorte Herzke<sup>1</sup>,  
6 4\*

7 1. NILU, Fram Centre, Tromsø, Norway, NO-9296

8 2. UiT – The Arctic University of Norway, Department of Community Medicine, Tromsø,  
9 Norway, NO-9037

10 3. Stockholm University, Department of Environmental Science, Stockholm, Sweden, SE-106  
11 91

12 4. Norwegian Institute for public Health, Oslo, Norway, NO-0213

13 **\*Corresponding authors**

14 Dorte Herzke - NILU, Fram Centre, Tromsø, Norway, NO-9296

15 [\\*dhe@nilu.no](mailto:dhe@nilu.no)

16

17 Summary: 21 pages, 6 figures 10 tables

18

19

20 The following information is included:  
21 Chemicals and consumables (Page S3); characteristics of Tromsø Study samples and pools  
22 (Page S3-S4); quality control measures for TF, EOF, TOP assay and target PFAS (Page S4-  
23 S11); data evaluation equations (Page S11-S12); PFAS concentrations used for FMB  
24 calculations (Page S13); TF and EOF concentrations in human blood from this study and from  
25 the literature (Page S14); multiple linear regression coefficients estimates and 95% confidence  
26 intervals for  $\ln(\text{TF})$ ,  $\ln(\text{EOF})$ ,  $\ln(\sum_{12} \text{PFAS})$ , % UEOF and TOP (Page S14); multiple linear  
27 regression (including sex and sampling year interaction terms) coefficients estimates and 95%  
28 confidence intervals for  $\ln(\sum_{12} \text{PFAS})$  and % UEOF (Page S15); UEOF concentrations in  
29 human blood from this study and from the literature (Page S15); TF, EOF, TOP,  $\sum_{12} \text{PFAS}$  and  
30 UEOF concentrations in serum pools containing the same individuals in 1986, 2007 and 2015  
31 (Page S16); UpSet plot showing the intersection of PFAA with increased concentrations after  
32 oxidation (Page S17); individual target PFAS in pooled serum from 1986, 2007 and 2015 (Page  
33 S18);  $\sum_{12} \text{PFAS}$  concentrations in relationship with mean age of the individuals in the pools  
34 (Page S19); individual target PFAS concentrations in men and women (Page S20).

35  
36  
37  
38  
39  
40  
41  
42  
43  
44

45 **1. Materials and methods**

46 **1.1. Chemicals and consumables**

47 Acetonitrile (ACN, LiChrosolv®), tert-butyl methyl ether (MTBE, Suprasolv®), fuming  
48 hydrochloric acid (HCl, p.a. 37%) and sodium hydroxide (NaOH, EMSURE®, ≥ 99.0%) were  
49 obtained from Merck (Darmstadt, Germany). Sodium persulfate (Na<sub>2</sub>S<sub>2</sub>O<sub>8</sub>, reagent grade, ≥  
50 98%, lot #BCCC8760) and ammonium acetate (NH<sub>4</sub>OAc, LiChropur™) were obtained from  
51 Sigma-Aldrich (Steinheim, Germany). Ammonia (NH<sub>3</sub>, solution 25%, AnalaR NORMAPUR)  
52 was purchased from VWR (Fontenay-sous-Bois, France). All native and isotopically labelled  
53 PFAS standards were obtained from Wellington Laboratories Inc. (Guelph, Ontario, Canada).

54

55 **1.2. Serum samples and pooling strategy**

56 **Figure S1**– Tromsø Study serum samples selection.

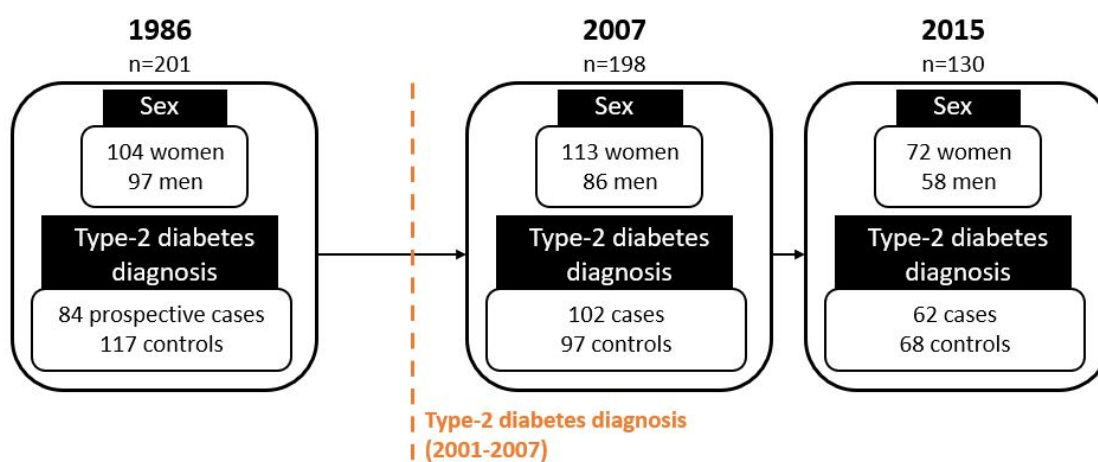

57

58

59

60

61

62

63

64 **Table S1** – Characteristics of the Tromsø Study serum pools.

| 1986 (n=167)   |          |            |                         |                   | 2007 (n=175)   |          |            |                         |                 | 2015 (n=130)   |          |            |                         |                 |
|----------------|----------|------------|-------------------------|-------------------|----------------|----------|------------|-------------------------|-----------------|----------------|----------|------------|-------------------------|-----------------|
| <i>Pool ID</i> | <i>n</i> | <i>Sex</i> | <i>Age mean (range)</i> | <i>Diabetes</i>   | <i>Pool ID</i> | <i>n</i> | <i>Sex</i> | <i>Age mean (range)</i> | <i>Diabetes</i> | <i>Pool ID</i> | <i>n</i> | <i>Sex</i> | <i>Age mean (range)</i> | <i>Diabetes</i> |
| 1              | 14       | Women      | 36 (25-45)              | Controls          | 1              | 14       | Women      | 57 (46-66)              | Controls        | 1              | 14       | Women      | 65 (54-74)              | Controls        |
| 2              | 12       | Women      | 49 (46-57)              | Controls          | 2              | 12       | Women      | 70 (67-78)              | Controls        | 2              | 12       | Women      | 78 (75-86)              | Controls        |
| 3              | 11       | Women      | 41 (30-45)              | Prospective cases | 3              | 11       | Women      | 62 (51-66)              | Cases           | 3              | 11       | Women      | 70 (59-74)              | Cases           |
| 4              | 8        | Women      | 49 (46-53)              | Prospective cases | 4              | 8        | Women      | 70 (67-74)              | Cases           | 4              | 8        | Women      | 78 (75-82)              | Cases           |
| 5              | 10       | Men        | 34 (17-47)              | Controls          | 5              | 10       | Men        | 55 (38-68)              | Controls        | 5              | 10       | Men        | 63 (46-76)              | Controls        |
| 6              | 10       | Men        | 51 (48-55)              | Controls          | 6              | 10       | Men        | 72 (69-76)              | Controls        | 6              | 10       | Men        | 80 (77-84)              | Controls        |
| 7              | 13       | Men        | 44 (33-58)              | Prospective cases | 7              | 13       | Men        | 65 (54-79)              | Cases           | 7              | 13       | Men        | 73 (62-87)              | Cases           |
| 8              | 15       | Women      | 31 (25-43)              | Controls          | 8              | 15       | Women      | 56 (46-64)              | Controls        | 8              | 15       | Women      | 63 (54-72)              | Controls        |
| 9              | 15       | Women      | 45 (43-47)              | Controls          | 9              | 15       | Women      | 67 (65-69)              | Controls        | 9              | 15       | Women      | 78 (74-82)              | Controls        |
| 10             | 15       | Women      | 52 (48-60)              | Controls          | 10             | 15       | Women      | 74 (70-81)              | Controls        | 10             | 15       | Women      | 70 (59-74)              | Cases           |
| 11             | 15       | Women      | 45 (43-48)              | Prospective cases | 11             | 15       | Women      | 60 (51-64)              | Cases           | 11             | 15       | Women      | 78 (75-83)              | Cases           |
| 12             | 15       | Men        | 37 (17-49)              | Controls          | 12             | 15       | Women      | 67 (65-69)              | Cases           | 12             | 15       | Men        | 61 (46-73)              | Controls        |
| 13             | 15       | Men        | 55 (50-61)              | Controls          | 13             | 15       | Women      | 74 (70-81)              | Cases           | 13             | 15       | Men        | 79 (74-84)              | Controls        |
| 14             | 15       | Men        | 40 (25-48)              | Prospective cases | 14             | 15       | Men        | 56 (38-66)              | Controls        | 14             | 15       | Men        | 81 (75-89)              | Cases           |
| 15             | 15       | Men        | 55 (49-60)              | Prospective cases | 15             | 15       | Men        | 72 (68-76)              | Controls        |                |          |            |                         |                 |
|                |          |            |                         |                   | 16             | 15       | Men        | 62 (54-66)              | Cases           |                |          |            |                         |                 |
|                |          |            |                         |                   | 17             | 15       | Men        | 71 (67-76)              | Cases           |                |          |            |                         |                 |

Pool ID: cells highlighted in green indicate pools with same individuals across 1986, 2007 and 2015  
n = number of individuals

65

66 **1.3. TF quality control**

67 A 9-point calibration curve ranging from 2.5 to 2500 ng of NaF in water ( $R^2 > 0.999$ ) was  
68 included at the beginning and end of each run. Quality control measures for each run included:  
69 (1) three sample boat blanks for limit of detection (LOD) calculation, (2) two sample boats  
70 spiked with 100 ng of PFOS standard, and (3) three measurements of a certified reference  
71 material (fluorine in clay, CRM 461). Blanks ranged between 18 and 21 ng F/mL (n=9) and  
72 LOD (average boat blanks + 3 times the standard deviation of the blanks) ranged between 23  
73 and 25 ng F/mL. The recovery of the PFOS standard ( $120 \pm 6\%$ , n=6) confirmed complete

74 combustion and measurements of the certified reference material showed good accuracy and  
75 precision (recovery:  $123 \pm 9 \%$ ,  $n=9$ ).

76

#### 77 **1.4. EOF quality control**

78 For each extraction batch (14 serum samples), the quality control measures included: (1) three  
79 extraction blanks, (2) three reference serum samples not spiked, (3) one reference serum sample  
80 spiked with 239 ng of PFOS, (4) one reference serum sample spiked with 500 ng of NaF. The  
81 reference serum was obtained from the Arctic Monitoring and Assessment Programme  
82 (AMAP) Ring Test for Persistent Organic Pollutants [1]. Each extraction batch was run  
83 separately and included a calibration curve at the beginning and end of the run (2.5-1000 ng of  
84 NaF in water,  $R^2 > 0.999$ ) and two sample boats spiked with 100 ng of PFOS standard. The  
85 extraction blanks ranged from 5 to 7 ng F/mL ( $n=12$ ) and the EOF LOD (average extraction  
86 blanks + 3 times the standard deviation of the blanks) ranged from 6 to 9 ng F/mL. The analysis  
87 of the reference serum samples spiked with PFOS confirmed good recovery and reproducibility  
88 of the EOF analysis in human serum (recovery:  $77 \pm 14 \%$ ,  $n=8$ ). The analysis of the controls  
89 spiked with NaF confirmed the removal of fluoride upon extraction (NaF recoveries ranging  
90 from 0 to 2 %,  $n=4$ ).

91

#### 92 **1.5. TOP assay quality control**

93 For each TOP assay batch (18 samples), a blank and an AMAP reference serum sample were  
94 included and processed as the samples. Blanks before and after oxidation showed low levels of  
95 PFAA (Table S2). LODs were calculated as the average concentration in the blanks plus 3  
96 times the standard deviation of the blanks and in case of no detection in the blanks, LODs were  
97 calculated by multiplying the noise of the blanks by 3. LODs before and after oxidation were  
98 comparable for most compounds (Table S2). Measured PFAA concentrations before oxidation

99 in the AMAP serum samples were within  $\pm 20\%$  of the reference values. Mean recoveries  
100 before TOP assay ranged from 61 to 78 % and mean recoveries after TOP assay ranged from  
101 55 to 65 %. Model precursors spiking oxidation experiments were performed as part of the  
102 validation described in our method paper and showed complete conversion for all spiked  
103 precursors and yields of PFAA ranging from 35-100% [2].

104

105

106 **Table S2** - Average blank concentrations and LODs before and after TOP assay in ng/mL of  
 107 serum (n=3).

| Compound       | Before TOP assay    |      | After TOP assay     |      |
|----------------|---------------------|------|---------------------|------|
|                | Blank concentration | LOD  | Blank concentration | LOD  |
| <b>PFBA</b>    | 0.15                | 0.47 | 0.12                | 0.49 |
| <b>PFPeA</b>   | 0.20                | 0.32 | 0.26                | 0.47 |
| <b>PFHxA</b>   | 0.03                | 0.10 | 0.13                | 0.39 |
| <b>PFHpA</b>   | 0.01                | 0.02 | 0.02                | 0.13 |
| <b>PFOA</b>    | 0.05                | 0.10 | 0.08                | 0.18 |
| <b>PFNA</b>    | 0.00                | 0.02 | 0.01                | 0.03 |
| <b>PFDA</b>    | 0.00                | 0.02 | 0.03                | 0.10 |
| <b>PFUnDA</b>  | 0.00                | 0.02 | 0.00                | 0.04 |
| <b>PFDoDA</b>  | 0.00                | 0.02 | 0.00                | 0.04 |
| <b>PFTTrDA</b> | 0.00                | 0.07 | 0.00                | 0.09 |
| <b>PFTeDA</b>  | 0.00                | 0.13 | 0.00                | 0.13 |
| <b>PFBS</b>    | 0.00                | 0.04 | 0.02                | 0.08 |
| <b>PFPeS</b>   | 0.00                | 0.07 | 0.00                | 0.07 |
| <b>PFHxS</b>   | 0.10                | 0.13 | 0.01                | 0.04 |
| <b>PFHpS</b>   | 0.00                | 0.03 | 0.00                | 0.03 |
| <b>PFOS</b>    | 0.09                | 0.16 | 0.06                | 0.14 |
| <b>PFNS</b>    | 0.00                | 0.04 | 0.00                | 0.04 |
| <b>PFDS</b>    | 0.00                | 0.05 | 0.00                | 0.05 |

108

109

110 **Table S3** – Recoveries in pooled serum samples before and after TOP assay (n=46).

| Compound               | Before TOP assay | After TOP assay |
|------------------------|------------------|-----------------|
| <sup>13</sup> C-PFBA   | 74 ± 7           | 58 ± 10         |
| <sup>13</sup> C-PFPeA  | 78 ± 5           | 62 ± 5          |
| <sup>13</sup> C-PFHxA  | 75 ± 7           | 63 ± 4          |
| <sup>13</sup> C-PFHpA  | 70 ± 5           | 65 ± 4          |
| <sup>13</sup> C-PFOA   | 73 ± 6           | 62 ± 6          |
| <sup>13</sup> C-PFNA   | 71 ± 5           | 58 ± 5          |
| <sup>13</sup> C-PFDA   | 78 ± 5           | 55 ± 3          |
| <sup>13</sup> C-PFUnDA | 61 ± 8           | 57 ± 5          |
| <sup>13</sup> C-PFDoDA | 72 ± 6           | 61 ± 7          |
| <sup>13</sup> C-PFTeDA | 75 ± 6           | 58 ± 7          |
| <sup>13</sup> C-PFHxS  | 74 ± 5           | 62 ± 6          |
| <sup>13</sup> C-PFOS   | 75 ± 3           | 61 ± 8          |

111

112 **1.6. Target PFAS quality control**

113 Target PFAS analyses on the EOF extracts included also the EOF extraction blanks (n=9). No  
 114 PFAA were detected in the blanks and the LODs were calculated using the standard error of  
 115 the regression divided the slope of the calibration curve multiplied by 3. LODs ranged from  
 116 0.03 to 0.13 ng/mL (Table S4). Measured PFAA concentrations in the AMAP serum samples  
 117 use as quality control were within +/- 20% of the reference values.

118 After the TOP assay the extracts were also analysed for C<sub>2</sub> and C<sub>3</sub>-PFAA using a Raptor Polar  
 119 X column. Trifluoroacetic acid (TFA) was analysed in a 5 minute isocratic run with 80 % 2mM  
 120 ammonium acetate in methanol and 20 % 2mM ammonium acetate in 90:10 water:methanol.  
 121 Perfluoropropionic acid (PFPrA), trifluoromethane sulfonic acid (TFMS), difluoro  
 122 (perfluoromethoxy) acetic acid (1,2-PFECA), difluoroacetic acid (DiFA) and chlorodifluoro  
 123 acetic acid (Cl-DiFA) were analysed in a 10 minute isocratic run using 80% 60:40



124 methanol:water with 0.05% formic acid and 20% 10 mM ammonium formate in water with  
125 0.05% formic acid, based on an application note from Restek [3]. For these analyses, serum  
126 extracts were spiked with <sup>13</sup>C-TFA before oxidation and recoveries ranged from 56 to 65 %  
127 (n=46). Concentrations in the blanks ranged from 0.00 to 0.25 ng/mL. LODs were calculated  
128 as the average concentration in the blanks plus 3 times the standard deviation of the blanks and  
129 in case of no detection in the blanks, LODs were calculated by multiplying the noise of the  
130 blanks by 3 (Table S4).

131

132

**Table S4** – Target PFAS analysed on EOF extracts by UHPLC-Orbitrap.

| Abbreviation                                       | Name                                            | LOD (ng/mL) |
|----------------------------------------------------|-------------------------------------------------|-------------|
| <b>PFCA (Perfluoroalkyl carboxylic acids)</b>      |                                                 |             |
| PFBA                                               | Perfluorobutanoic acid                          | 0.07        |
| PFPeA                                              | Perfluoropentanoic acid                         | 0.06        |
| PFHxA                                              | Perfluorohexanoic acid                          | 0.07        |
| PFHpA                                              | Perfluoroheptanoic acid                         | 0.07        |
| PFOA                                               | Perfluorooctanoic acid                          | 0.06        |
| PFNA                                               | Perfluorononanoic acid                          | 0.07        |
| PFDA                                               | Perfluorodecanoic acid                          | 0.09        |
| PFUnDA                                             | Perfluoroundecanoic acid                        | 0.10        |
| PFDoDA                                             | Perfluorododecanoic acid                        | 0.10        |
| PFTrDA                                             | Perfluorotridecanoic acid                       | 0.10        |
| PFTeDA                                             | Perfluorotetradecanoic acid                     | 0.13        |
| PFPeDA                                             | Perfluoropentadecanoic acid                     | 0.13        |
| PFHxDA                                             | Perfluorohexadecanoic acid                      | 0.14        |
| PFOcDA                                             | Perfluorooctadecanoic acid                      | 0.13        |
| <b>PFSA (Perfluoroalkyl sulfonic acids)</b>        |                                                 |             |
| PFBS                                               | Perfluorobutane sulfonic acid                   | 0.06        |
| PFPeS                                              | Perfluoropentane sulfonic acid                  | 0.06        |
| PFHxS                                              | Perfluorohexane sulfonic acid                   | 0.06        |
| PFHpS                                              | Perfluoroheptane sulfonic acid                  | 0.06        |
| PFOS                                               | Perfluorooctane sulfonic acid                   | 0.03        |
| PFNS                                               | Perfluorononane sulfonic acid                   | 0.04        |
| PFDS                                               | Perfluorodecane sulfonic acid                   | 0.05        |
| PFUnDS                                             | Perfluoroundecane sulfonic acid                 | 0.06        |
| <b>PFECA (Perfluoroalkyl ether sulfonic acids)</b> |                                                 |             |
| GenX                                               | Ammonium perfluoro-4,8-dioxa-3H-nonanoic acid   | 0.08        |
| ADONA                                              | Perfluoro-4,8-dioxa-3H-nonanoic acid            | 0.08        |
| <b>FTCA (Fluorotelomer carboxylic acids)</b>       |                                                 |             |
| 3:3 FTCA                                           | 3:3 Fluorotelomer carboxylic acid               | 0.06        |
| 5:3 FTCA                                           | 5:3 Fluorotelomer carboxylic acid               | 0.08        |
| 7:3 FTCA                                           | 7:3 Fluorotelomer carboxylic acid               | 0.08        |
| <b>FTS (Fluorotelomer sulfonates)</b>              |                                                 |             |
| 4:2 FTS                                            | 4:2 Fluorotelomer sulfonic acid                 | 0.06        |
| 6:2 FTS                                            | 6:2 Fluorotelomer sulfonic acid                 | 0.08        |
| 8:2 FTS                                            | 8:2 Fluorotelomer sulfonic acid                 | 0.08        |
| <b>Perfluorooctane sulfonamido substances</b>      |                                                 |             |
| FOSA                                               | Perfluorooctane sulfonamide                     | 0.07        |
| Me-FOSA                                            | N-Methyl perfluorooctane sulfonamide            | 0.07        |
| Et-FOSA                                            | N-Ethyl perfluorooctane sulfonamide             | 0.07        |
| FOSAA                                              | Perfluorooctane sulfonamidoacetic acid          | 0.06        |
| Me-FOSAA                                           | N-Methyl perfluorooctane sulfonamidoacetic acid | 0.06        |
| Et-FOSAA                                           | N-Ethyl perfluorooctane sulfonamidoacetic acid  | 0.06        |
| Me-FOSE                                            | N-Methyl perfluorooctane sulfonamido ethanol    | 0.08        |
| Et-FOSE                                            | N-Ethyl perfluorooctane sulfonamido ethanol     | 0.08        |
| <b>CI-PFAES</b>                                    |                                                 |             |
| 9Cl-PF3ONS                                         | 9Cl-Perfluoro-3-oxononane sulfonic acid         | 0.10        |
| 11Cl-PF3OUs                                        | 11Cl-Perfluoro-3-oxoundecane sulfonic acid      | 0.10        |
| <b>PAPs</b>                                        |                                                 |             |
| 4:2 monoPAP                                        | 4:2 Fluorotelomer phosphate monoester           | 0.10        |
| 4:2 diPAP                                          | 4:2 Fluorotelomer phosphate diester             | 0.10        |
| 6:2 monoPAP                                        | 6:2 Fluorotelomer phosphate monoester           | 0.10        |
| 6:2 diPAP                                          | 6:2 Fluorotelomer phosphate diester             | 0.10        |
| 6:2/8:2 diPAP                                      | 6:2/8:2 Fluorotelomer phosphate diester         | 0.10        |
| 6:2/10:2 diPAP                                     | 6:2/10:2 Fluorotelomer phosphate diester        | 0.12        |
| 6:2/12:2 diPAP                                     | 6:2/12:2 Fluorotelomer phosphate diester        | 0.12        |

|                |                                          |      |
|----------------|------------------------------------------|------|
| 6:2/14:2 diPAP | 6:2/14:2 Fluorotelomer phosphate diester | 0.12 |
| 8:2 diPAP      | 8:2 Fluorotelomer phosphate diester      | 0.13 |
| 8:2/10:2 diPAP | 8:2/10:2 Fluorotelomer phosphate diester | 0.13 |
| 10:2 monoPAP   | 10:2 Fluorotelomer phosphate monoester   | 0.13 |
| 10:2 diPAP     | 10:2 Fluorotelomer phosphate diester     | 0.13 |

134

135

136

137 **Table S5** - Average blank concentrations and LODs before and after TOP assay in ng/mL of

138 serum (n=3).

| <b>Compound</b>  | <b>Blank concentration</b> | <b>LOD</b> |
|------------------|----------------------------|------------|
| <b>TFA</b>       | 0.28                       | 0.32       |
| <b>PFPrA</b>     | 0.10                       | 0.13       |
| <b>TFMS</b>      | 0.00                       | 0.07       |
| <b>1,2-PFECA</b> | 0.00                       | 0.07       |
| <b>DiFA</b>      | 0.00                       | 0.07       |
| <b>Cl-DiFA</b>   | 0.00                       | 0.07       |

139

140

### 141 **1.7. Data evaluation**

142 For comparison with EOF values, target PFAS concentrations measured in the EOF extracts

143 and  $\Delta$ PFAA concentrations from the TOP assay were converted to F equivalents using the

144 following equation:

$$Concentration \left( \frac{ng\ F}{mL} \right) = \frac{concentration \left( \frac{ng}{mL} \right) \cdot nF \cdot AW_F}{MW_{PFAS}} \quad (S1)$$

145

146 where  $n_F$  is the number of fluorine atoms in the PFAS structure,  $A_F$  is the atomic weight of  
147 fluorine and  $MW_{PFAS}$  is the molecular weight of the PFAS which concentration is being  
148 converted.

149 Differences in TF, EOF,  $\sum_{12}$  PFAS, unidentified EOF and TOP between sampling years were  
150 assessed by multiple linear regression to account for the influence of sex and age (as weighted  
151 mean of the age of the individuals in the pools expressed in years) using the following equation:

$$y = \beta_0 + \beta_1 dummy\ 1 + \beta_2 dummy\ 2 + \beta_3 sex + \beta_4 age \quad (S2)$$

152 where  $y$  is the log transformed concentration for TF, EOF and  $\sum_{12}$  PFAS, the  $\Delta PFAA$   
153 concentration in ng/mL for TOP and the percentage contribution to EOF for UEOF;  $\beta_0$  is the  
154 intercept of the multiple linear regression;  $\beta_1$ ,  $\beta_2$ ,  $\beta_3$  and  $\beta_4$  are the regression coefficients for  
155 the predictor variables; dummy 1 is a dummy variable equal to 1 if sampling year is 1986, equal  
156 to 0 if sampling year is 2007 or 2015; dummy 2 is a dummy variable equal to 1 if sampling  
157 year is 2015, equal to 0 if sampling year is 1986 and 2007; sex is categorical variable equal to  
158 0 for women and equal to 1 for men; age is the weighted mean age of the individuals making  
159 up each pool expressed in years.

160 When sex was a significant predictor, differences in concentrations between men and women  
161 at each sampling year were assessed by adding an interaction term between sex and each  
162 sampling year dummy variable as described by equation S3.

163

$$y = \beta_0 + \beta_1 dummy\ 1 + \beta_2 dummy\ 2 + \beta_3 sex + \beta_4 age + \beta_5 dummy1\ sex + \beta_6 dummy2\ sex \quad (S3)$$

164

165

166 **2. Results**

167 **Table S6 – PFAS concentrations (ng/mL) used for fluorine mass-balance calculations**

168 (concentrations are not recovery corrected).

|                  | 1986 (n=15) |        |       |            | 2007 (n=17) |        |      |            | 2015 (n=14) |        |      |           |
|------------------|-------------|--------|-------|------------|-------------|--------|------|------------|-------------|--------|------|-----------|
|                  | DF          | Median | Mean  | Range      | DF          | Median | Mean | Range      | DF          | Median | Mean | Range     |
| <b>PFHpA</b>     | 0/15        | -      | -     | -          | 0/17        | -      | -    | -          | 0/14        | -      | -    | -         |
| <b>PFOA</b>      | 15/15       | 1.60   | 1.50  | 0.88-2.04  | 17/17       | 2.32   | 2.40 | 2.00-2.96  | 14/14       | 1.52   | 1.56 | 1.12-2.24 |
| <b>PFNA</b>      | 15/15       | 0.24   | 0.25  | 0.08-0.64  | 17/17       | 1.04   | 0.99 | 0.72-1.52  | 14/14       | 1.14   | 1.18 | 0.68-1.60 |
| <b>PFDA</b>      | 1/15        | <0.09  | <0.09 | <0.09-0.24 | 17/17       | 0.40   | 0.39 | 0.20-0.84  | 14/14       | 0.50   | 0.50 | 0.20-0.84 |
| <b>PFUnDA</b>    | 15/15       | 0.32   | 0.32  | 0.12-0.56  | 17/17       | 0.60   | 0.60 | 0.24-1.56  | 14/14       | 0.62   | 0.58 | 0.24-1.20 |
| <b>PFDoDA</b>    | 0/15        | -      | -     | -          | 0/17        | -      | -    | -          | 0/14        | -      | -    | -         |
| <b>PFHxS</b>     | 15/15       | 0.40   | 0.38  | 0.16-0.72  | 17/17       | 1.44   | 1.59 | 1.04-4.68  | 14/14       | 1.24   | 1.36 | 0.72-3.12 |
| <b>PFHpS</b>     | 4/15        | <0.03  | <0.03 | <0.03-0.08 | 17/17       | 0.20   | 0.17 | 0.04-0.36  | 14/14       | 0.08   | 0.09 | 0.04-0.20 |
| <b>br-PFOS</b>   | 15/15       | 3.68   | 3.58  | 2.48-5.16  | 17/17       | 5.44   | 5.26 | 3.68-7.16  | 14/14       | 3.14   | 3.40 | 2.56-4.88 |
| <b>lin-PFOS</b>  | 15/15       | 10.9   | 10.4  | 6.72-15.4  | 17/17       | 16.2   | 16.5 | 11.1-30.2  | 14/14       | 10.4   | 11.3 | 5.52-18.8 |
| <b>FOSAA</b>     | 9/15        | 0.08   | 0.08  | <0.06-0.20 | 0/17        | -      | -    | -          | 0/14        | -      | -    | -         |
| <b>Me-FOSAA</b>  | 14/15       | 0.16   | 0.13  | <0.06-0.28 | 10/17       | 0.08   | 0.08 | <0.06-0.20 | 0/14        | -      | -    | -         |
| <b>Et-FOSAA</b>  | 15/15       | 0.28   | 0.27  | 0.12-0.52  | 0/17        | -      | -    | -          | 0/14        | -      | -    | -         |
| <b>∑ 12 PFAS</b> | 15/15       | 17.8   | 17.2  | 11.0-24.1  | 17/17       | 27.9   | 28.3 | 21.5-46.1  | 14/14       | 19.2   | 20.3 | 11.4-30.0 |

DF = detection frequency: number of pools with PFAS concentration > LOD.

169

170

171

172

173

174

175

176

177

178 **Table S7** – Descriptive statistics for TF and EOF concentrations (ng F/mL) in the Tromsø  
 179 Study pooled serum samples from 1986, 2007 and 2015 and in samples from previous studies  
 180 available in the literature (n=number of pools/number of individual samples).

| Study                   | Country           | Sampling year | Matrix         | n   | TF (ng F/mL) |      |            | EOF (ng F/mL) |      |           |
|-------------------------|-------------------|---------------|----------------|-----|--------------|------|------------|---------------|------|-----------|
|                         |                   |               |                |     | Median       | Mean | Range      | Median        | Mean | Range     |
| This study              | Norway            | 1986          | Serum (pooled) | 15  | 79.1         | 112  | <25.0-1330 | 22.2          | 23.3 | 13.3-45.3 |
| This study              | Norway            | 2007          | Serum (pooled) | 17  | 74.2         | 74.8 | <25.0-1212 | 20.8          | 20.5 | 16.2-30.3 |
| This study              | Norway            | 2015          | Serum (pooled) | 14  | 68.3         | 71.6 | <25.0-265  | 18.5          | 18.4 | 12.6-22.6 |
| Miyake et al. (2007)    | Japan             | 2003-2004     | Whole blood    | 3   | 208          | 214  | 181-262    | <6            | <6   | <6-8.89   |
| Miyake et al. (2007)    | USA               | 2001          | Plasma         | 4   | 149          | 163  | 140-189    | 45.2          | 38.3 | 17.8-59.0 |
| Yeung et al. (2008)     | China             | 2004          | Whole blood    | 30  | -            | -    | 60.6-166   | -             | -    | <6-43.4   |
| Yeung and Mabury (2016) | China             | 2004          | Whole blood    | 34  | -            | -    | -          | 17            | 18.4 | 8.22-94.4 |
| Yeung and Mabury (2016) | Germany (Halle)   | 1995-2009     | Plasma         | 42  | -            | -    | -          | -             | 15.9 | 5.29-43.9 |
| Yeung et al. (2016)     | Germany (Munster) | 1982-2009     | Plasma         | 80  | -            | -    | -          | -             | 23.7 | 9.20-115  |
| Miaz et al. (2020)      | Sweden            | 1996-2017     | Serum (pooled) | 57  | -            | -    | -          | -             | -    | 8.10-32.0 |
| Aro et al. (2021)       | Sweden            | 2015          | Whole blood    | 9   | -            | -    | -          | -             | 24.8 | 17.6-37.8 |
| Aro et al. (2021)       | Sweden (Ronneby)  | 2014-2016     | Whole blood    | 20  | -            | -    | -          | -             | 234  | <107-592  |
| Aro et al. (2021)       | Sweden            | 2018-2019     | Whole blood    | 130 | -            | -    | -          | -             | -    | 0.51-48.7 |
| Kaiser et al. (2021)    | Austria           | 2021          | Serum (pooled) | 6   | -            | -    | -          | -             | 3.83 | 2.85-7.17 |

181

182 **Table S8** – Multiple linear regression coefficients estimates and 95% confidence intervals for  
 183  $\ln(\text{TF})$ ,  $\ln(\text{EOF})$ ,  $\ln(\sum 12 \text{ PFAS})$ , % UEOF and TOP in pooled serum samples from the Tromsø  
 184 Study.

|                                          | $\ln(\text{TF})$      | $\ln(\text{EOF})$      | $\ln(\sum 12 \text{ PFAS})$ | % UEOF                   | TOP                      |
|------------------------------------------|-----------------------|------------------------|-----------------------------|--------------------------|--------------------------|
|                                          | Estimate (95% CI)     | Estimate (95% CI)      | Estimate (95% CI)           | Estimate (95% CI)        | Estimate (95% CI)        |
| $\beta_0$ (intercept)                    | 1.17 (2.68 to 5.03)   | 2.55 (1.91 to 3.20)    | 2.76 (2.33 to 3.08)         | 61.4 (18.8 to 104)       | 0.49 (-0.48 to 1.45)     |
| $\beta_1$ (1986-2007)                    | 1.41 (-0.15 to 2.97)  | 0.29* (0.03 to 0.55)   | -0.48*** (-0.61 to -0.35)   | 22.8* (5.60 to 40.0)     | 0.14 (-0.25 to 0.53)     |
| $\beta_2$ (2015-2007)                    | -0.39 (-1.47 to 0.68) | -0.16 (-0.34 to 0.02)  | -0.41*** (-0.51 to -0.30)   | 18.2** (6.35 to 30.0)    | 0.02 (-0.24 to 0.29)     |
| $\beta_3$ (sex)                          | 0.04 (-0.77 to 0.85)  | -0.05 (-0.18 to 0.09)  | 0.18*** (0.10 to 0.26)      | -14.3** (-23.3 to -5.32) | -0.16 (-0.36 to 0.05)    |
| $\beta_4$ (age mean)                     | 0.05 (-0.01 to 0.11)  | 0.01 (-0.002 to 0.017) | 0.02*** (0.01 to 0.02)      | -0.64 (-1.27 to 0.01)    | -0.001 (-0.015 to 0.013) |
| R <sup>2</sup>                           | 0.084                 | 0.209                  | 0.796                       | 0.594                    | 0.091                    |
| F-test p-value                           | 0.445                 | 0.042                  | 0.000                       | 0.000                    | 0.409                    |
| *p < 0.05<br>**p < 0.01<br>*** p < 0.001 |                       |                        |                             |                          |                          |

185

186

187 **Table S9** – Multiple linear regression (including sex and sampling year interaction terms)  
 188 coefficients estimates and 95% confidence intervals for  $\ln(\sum 12 \text{ PFAS})$  and % UEOF in pooled  
 189 serum samples from the Tromsø Study.

|                                          | <b><math>\ln(\sum 12 \text{ PFAS})</math></b> | <b>% UEOF</b>           |
|------------------------------------------|-----------------------------------------------|-------------------------|
|                                          | Estimate (95% CI)                             | Estimate (95% CI)       |
| $\beta_0$ (intercept)                    | 2.72 (2.34 to 3.11)                           | 64.4 (20.3 to 109)      |
| $\beta_1$ (1986-2007)                    | -0.17 (-0.35 to 0.01)                         | 18.3 (-2.27 to 38.8)    |
| $\beta_2$ (2015-2007)                    | -0.40*** (-0.53 to -0.27)                     | 17.1* (1.91 to 32.3)    |
| $\beta_3$ (2007 sex)                     | 0.16* (0.02 to 0.28)                          | -18.3* (-33.4 to -3.14) |
| $\beta_4$ (age mean)                     | 0.02*** (0.01 to 0.02)                        | -0.66* (-1.31 to -0.01) |
| $\beta_5$ (1986 sex)                     | 0.08 (-0.11 to 0.27)                          | 9.24 (-12.7 to 31.2)    |
| $\beta_6$ (2015 sex)                     | -0.01 (-0.02 to 0.18)                         | 3.04 (-19.4 to 25.5)    |
| R <sup>2</sup>                           | 0.802                                         | 0.602                   |
| F-test p-value                           | 0.000                                         | 0.000                   |
| *p < 0.05<br>**p < 0.01<br>*** p < 0.001 |                                               |                         |

190

191 **Table S10** – Descriptive statistics for UEOF concentrations (ng F/mL and/or %) in the Tromsø  
 192 Study pooled serum samples from 1986, 2007 and 2015 and in samples from previous studies  
 193 available in the literature (n=number of pools/number of individual samples).

| Study                   | Country           | Sampling year | Matrix         | n   | UEOF                |                     |                             |
|-------------------------|-------------------|---------------|----------------|-----|---------------------|---------------------|-----------------------------|
|                         |                   |               |                |     | Median              | Mean                | Range                       |
| This study              | Norway            | 1986          | Serum (pooled) | 15  | 10.5 ng F/mL<br>46% | 10.9 ng F/mL<br>46% | 2.93-34.8 ng F/mL<br>21-77% |
| This study              | Norway            | 2007          | Serum (pooled) | 17  | 2.26 ng F/mL<br>10% | 3.17 ng F/mL<br>14% | 0.00-10.9 ng F/mL<br>0-40%  |
| This study              | Norway            | 2015          | Serum (pooled) | 14  | 7.54 ng F/mL<br>37% | 5.32 ng F/mL<br>27% | 0.00-9.74 ng F/mL<br>0-56%  |
| Miyake et al. (2007)    | Japan             | 2003-2004     | Whole blood    | 3   | -                   | -                   | 0.00-1.38 ng F/mL<br>0-15%  |
| Miyake et al. (2007)    | USA               | 2001          | Plasma         | 4   | -                   | -                   | 0.00-4.40 ng F/mL<br>0-15%  |
| Yeung et al. (2008)     | China             | 2004          | Whole blood    | 30  | -                   | -                   | 15-43%                      |
| Yeung and Mabury (2016) | China             | 2004          | Whole blood    | 34  | -                   | -                   | 14-69%                      |
| Yeung and Mabury (2016) | Germany (Halle)   | 1995-2009     | Plasma         | 42  | -                   | -                   | 0.0-9.5 ng F/mL             |
| Yeung et al. (2016)     | Germany (Munster) | 1982-2009     | Plasma         | 80  | -                   | -                   | 0.0-9.9 ng F/mL             |
| Miaz et al. (2020)      | Sweden            | 1996-2017     | Serum (pooled) | 57  | -                   | -                   | 11-75%                      |
| Aro et al. (2021)       | Sweden            | 2015          | Whole blood    | 9   | -                   | 84%                 | 71-97%                      |
| Aro et al. (2021)       | Sweden (Ronneby)  | 2014-2016     | Whole blood    | 20  | -                   | 37%                 | 0-76%                       |
| Aro et al. (2021)       | Sweden            | 2018-2019     | Whole blood    | 130 | -                   | 0-99%               | -                           |
| Kaiser et al. (2021)    | Austria           | 2021          | Serum (pooled) | 6   | -                   | 1.17 ng F/mL<br>24% | -                           |

194

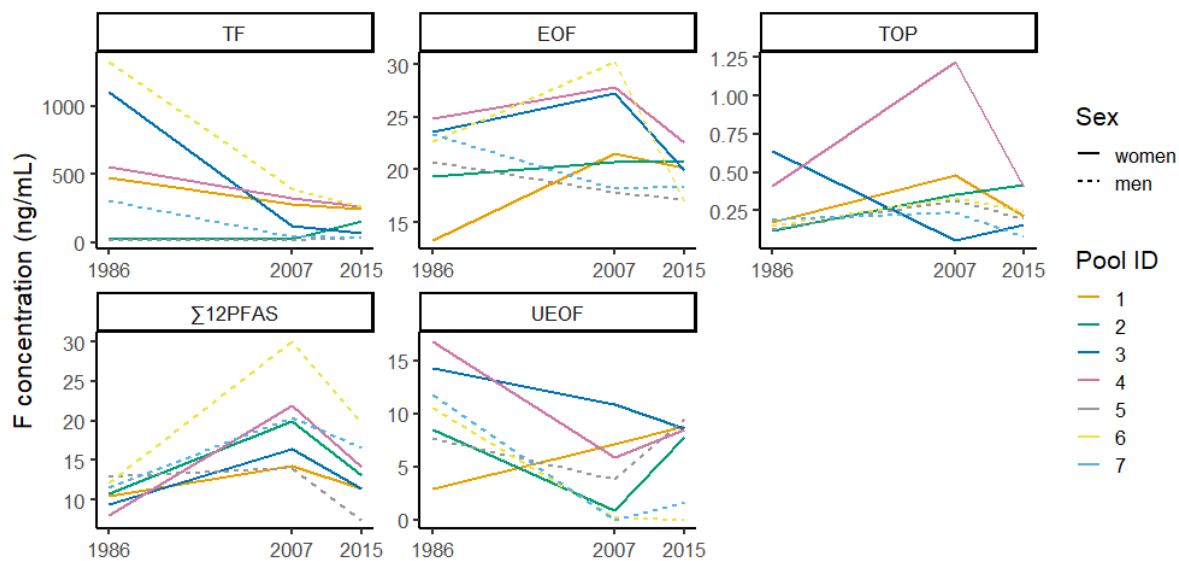

195

196 **Figure S2** – TF, EOF, TOP,  $\Sigma_{12}$ PFAS and UEOF concentrations (ng F/mL) in serum pools  
 197 from the Tromsø Study containing the same individuals in 1986, 2007 and 2015.

198



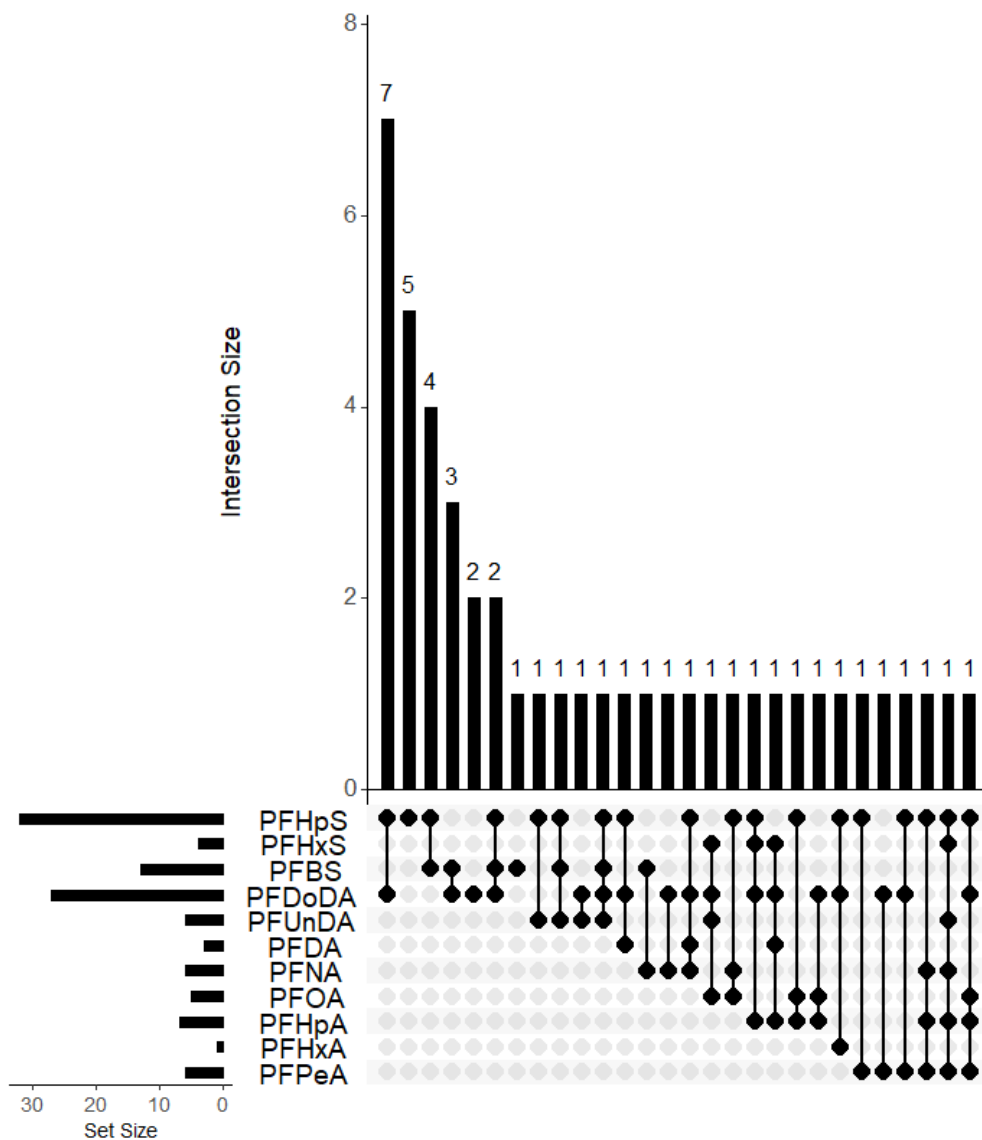

199

200 **Figure S3** - UpSet plot showing the intersection of PFAs with increased concentrations after  
 201 oxidation. The bar chart shows the number of pools with increases in concentrations of a  
 202 combination of PFAs. The graphical table underneath indicates the PFAA combinations (black  
 203 dots and lines). The frequency count of each PFA across all subsets is shown as a smaller bar  
 204 chart on the left side of the graphical table.

205

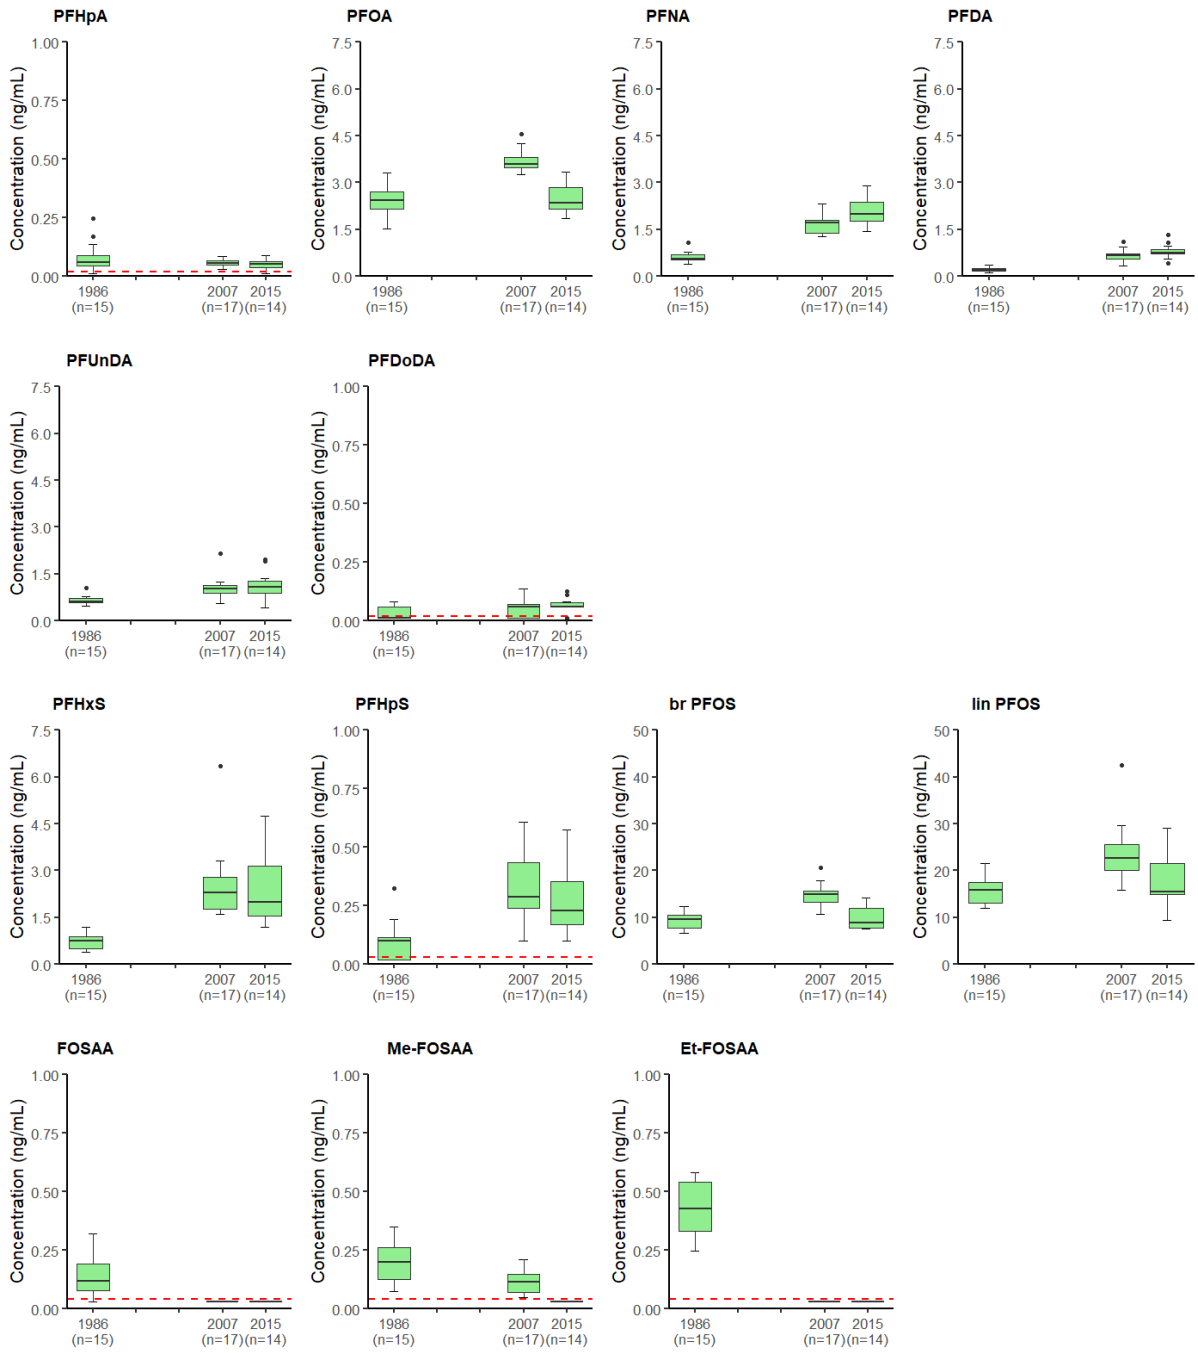

206

207

208

209 **Figure S4 – Target PFAS (ng/ml) in pooled serum samples from the Tromsø Study collected**

210 **in 1986, 2007 and 2015.**

211

212

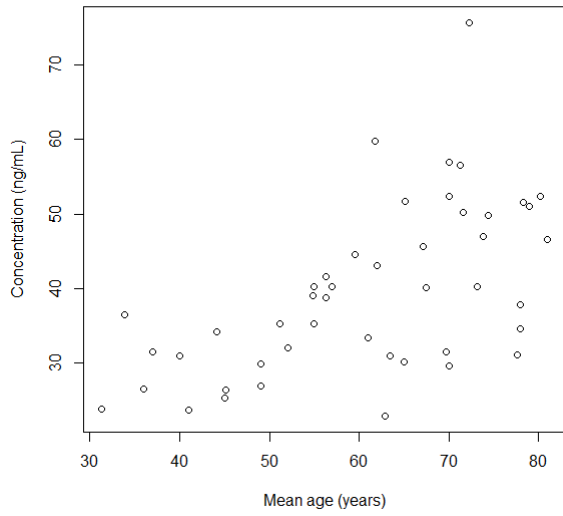

213  
214

215 **Figure S5** – Concentrations of  $\Sigma 12$  PFAS in pooled serum samples from the Tromsø Study  
216 collected in 1986, 2007 and 2015 in relationship with mean age of the individuals in the pools  
217 in years.

218

219

220

221

222

223

224



233 **References**

- 234 1. AMAP, *AMAP Assessment 2021: Human Health in the Arctic*. 2022, Arctic  
235 Monitoring and Assessment Programme (AMAP): Tromsø, Norway. p. 240.
- 236 2. Cioni, L., et al., *Total Oxidizable Precursors Assay for PFAS in Human Serum*.  
237 Environment International, 2022(170).
- 238 3. Restek. *Raptor Polar X: Separate a Wide Variety of Polar Analytes with a Novel*  
239 *Hybrid Stationary Phase* [https://www.restek.com/row/technical-literature-](https://www.restek.com/row/technical-literature-library/articles/raptor-polar-x-separate-a-wide-variety-of-polar-analytes-with-a-novel-hybrid-stationary-phase/)  
240 [library/articles/raptor-polar-x-separate-a-wide-variety-of-polar-analytes-with-a-](https://www.restek.com/row/technical-literature-library/articles/raptor-polar-x-separate-a-wide-variety-of-polar-analytes-with-a-novel-hybrid-stationary-phase/)  
241 [novel-hybrid-stationary-phase/](https://www.restek.com/row/technical-literature-library/articles/raptor-polar-x-separate-a-wide-variety-of-polar-analytes-with-a-novel-hybrid-stationary-phase/). 2020.

242
